# THE AMERICAN JOURNAL OF PSYCHIATRY

---

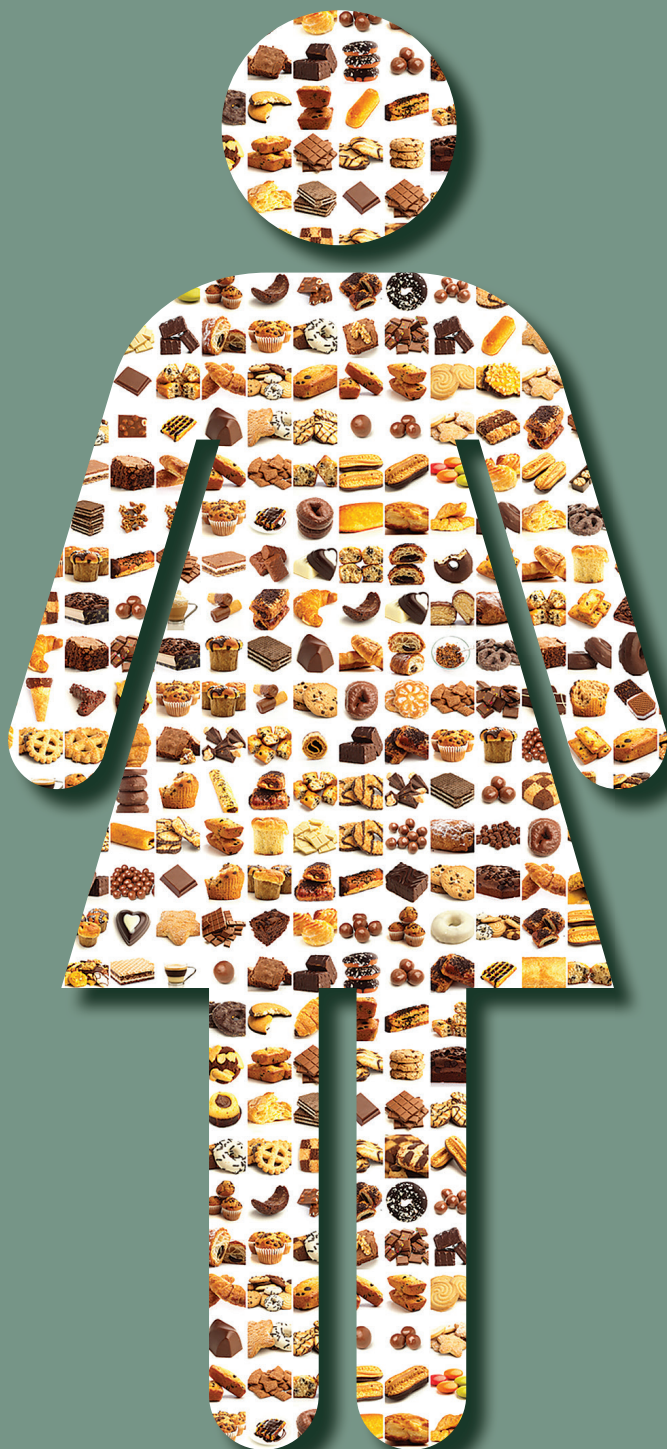

Antidepressant Efficacy of  
Ketamine in Treatment-Resistant  
Major Depression: A Two-Site  
Randomized Controlled Trial

James W. Murrough, M.D., et al. 1134

◀ Altered Insula Response to Sweet  
Taste Processing After Recovery  
From Anorexia and Bulimia  
Nervosa

Tyson A. Oberndorfer, M.D., et al. 1143

Impact of Maternal Depression  
Across the First 6 Years of Life on  
the Child's Mental Health, Social  
Engagement, and Empathy: The  
Moderating Role of Oxytocin

Yael Apter-Levy, M.A., et al. 1161

Neural Mechanisms of Frustration  
in Chronically Irritable Children

Christen M. Deveney, Ph.D., et al. 1186

**October 2013**

**Volume 170 • Number 10**

---

Official Journal of the  
AMERICAN PSYCHIATRIC ASSOCIATION

---

[ajp.psychiatryonline.org](http://ajp.psychiatryonline.org)
