# THE AMERICAN JOURNAL OF PSYCHIATRY

## En este número

A20

### Perspectivas

#### Editoriales

- 1079 **Ketamina para la depresión resistente al tratamiento: ¿Lista o no para el uso clínico?**  
A. John Rush
- 1082 **Cerebro, recompensa y trastornos alimentarios: ¿Cuestión de gusto?**  
Miguel Alonso-Alonso
- 1086 **Sincronía social y oxitocina: Del comportamiento a los genes y a la terapéutica**  
Eric Hollander [Audio](#)
- 1090 **La asociación entre el tabaquismo materno durante el embarazo y el trastorno bipolar en los hijos: Interpretaciones alternativas**  
Mario Maj
- 1093 **Irritabilidad severa en los jóvenes: trastorno de desregulación disruptiva del estado de ánimo y cambios en los circuitos cerebrales asociados**  
Neal D. Ryan

#### Comentario

- 1097 **Los próximos 50 años: Una nueva visión de la "Comunidad de la Salud Mental"**  
Honorable Patrick J. Kennedy, John F. Greden, y Michelle Riba
- 1099 **Clasificación en el DSM-5 de los trastornos del ciclo sueño-vigilia: Visión general para el uso en la práctica clínica**  
Charles F. Reynolds, III y Ruth O'Hara [Audio](#)

#### Discursos Presidenciales

- 1102 **Discurso presidencial**  
Dilip V. Jeste
- 1106 **Respuesta al discurso presidencial**  
Jeffrey A. Lieberman
- 1108 **Dilip V. Jeste, M.D., 139° Presidente, 2012–2013**  
Carolyn B. Robinowitz

#### Conferencia de Caso Clínico

- 1110 **Infanticidio en un caso de Folie à Deux**  
Tahir Rahman, Karissa A. Grellner, Bruce Harry, Niels Beck, y John Lauriello [Audio](#)

#### Imágenes en Psiquiatría

- 1113 **James H. Scully, Jr., M.D., Director Médico de la American Psychiatric Association, 2003–2013**  
Robert Freedman

#### Resúmenes y Reseñas

- 1114 **Maltrato infantil y psicopatología: Un caso para variantes ecofenotípicas como subtipos clínicos y neurobiológicos diferenciados**  
Martin H. Teicher y Jacqueline A. Samson

#### Nuevas Investigaciones

#### Artículos

- 1134 **Eficacia antidepresiva de la ketamina en la depresión mayor resistente al tratamiento: Un ensayo controlado aleatorizado en dos localizaciones**  
James W. Murrough, Dan V. Iosifescu, Lee C. Chang, Rayan K. Al Jurdi, Charles M. Green, Andrew M. Perez, Syed Iqbal, Sarah Pillemer, Alexandra Foulkes, Asim Shah, Dennis S. Charney, y Sanjay J. Mathew [Audio](#) [Guías clínicas](#) [Editorial](#)
- 1143 **Respuesta alterada de la ínsula al procesamiento del sabor dulce después de recuperación de anorexia y bulimia nerviosas**  
Tyson A. Oberndorfer, Guido K.W. Frank, Alan N. Simmons, Angela Wagner, Danyale McCurdy, Julie L. Fudge, Tony T. Yang, Martin P. Paulus, y Walter H. Kaye [Audio](#) [Guías clínicas](#) [Editorial](#)
- 1152 **Alteraciones en estructuras cerebrales relacionadas con los circuitos de recompensa al gusto en pacientes enfermos y recuperados de anorexia nerviosa y bulimia nerviosa**  
Guido K. Frank, Megan E. Shott, Jennifer O. Hagman, y Vijay A. Mittal [Audio](#) [Guías clínicas](#) [EMC](#)
- 1161 **Impacto de la depresión materna durante los 6 primeros años de vida en la salud mental, la participación social y la empatía del niño: El papel moderador de la oxitocina**  
Yael Apter-Levi, Michal Feldman, Adam Vakart, Richard P. Ebstein, y Ruth Feldman [Audio](#) [EMC](#) [Editorial](#)
- 1169 **Oxitocina y disminución de la hipersensibilidad a la amenaza social en mujeres con trastorno límite de la personalidad**  
Katja Bertsch, Matthias Gamer, Brigitte Schmidt, Ilina Schmidinger, Stephan Walther,

Thorsten Kästel, Knut Schnell, Christian Büchel, Gregor Domes, y Sabine C. Herpertz **Audio**  
**Editorial**

**1178 Tabaquismo materno durante el embarazo y trastorno bipolar en los hijos**

Ardesheer Talati, Yuanyuan Bao, Jake Kaufman, Ling Shen, Catherine A. Schaefer, y Alan S. Brown **Editorial**

**1186 Mecanismos neuronales de la frustración en niños con irritabilidad crónica**

Christen M. Deveney, Megan E. Connolly, Catherine T. Haring, Brian L. Bones, Richard C. Reynolds, Pilyoung Kim, Daniel S. Pine, y Ellen Leibenluft **Audio** **Guías clínicas** **EMC** **Editorial**

**1195 Respuesta a las “amenazas aprendidas”: Un estudio con fMRI de ansiedad en adolescentes y adultos**

Jennifer C. Britton, Christian Grillon, Shmuel Lissek, Maxine A. Norcross, Kristin L. Szuhany, Gang Chen, Monique Ernst, Eric E. Nelson, Ellen Leibenluft, Tomer Shechner, y Daniel S. Pine

**1205 Asociación entre la variación en el desarrollo neuropsicosocial y la trayectoria de la severidad del TDAH en la infancia temprana**

Khushmand Rajendran, Joey W. Trampush, David Rindskopf, David J. Marks, Sarah O’Neill, y Jeffrey M. Halperin

Social Cognition in Schizophrenia: From Evidence to Treatment [Cognición social en esquizofrenia: de la evidencia al tratamiento]

Psychotherapy in an Age of Narcissism: Modernity, Science, and Society [Psicoterapia en la era del narcisismo: Modernidad, ciencia y sociedad]

The Psychological Significance of the Blush [La importancia psicológica del rubor]

**Otros Temas de Interés**

**1219 Educación Médica Continuada**

**A6 Directivos de la American Psychiatric Association**

**A14 Calendario**

**A18 Contenidos del *British Journal of Psychiatry***

**A19 Contenidos del *Shanghai Archives of Psychiatry***

**Cubierta**

Diseño de la cubierta de  
Sergey Ivanov.

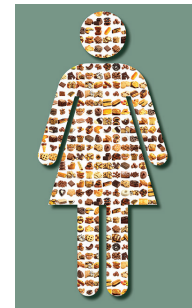

**Comunicados y Actualizaciones**

**Cartas al Editor**

**1212** Los niveles elevados de Tau CSF están asociados a la psicosis en la enfermedad de Alzheimer  
Neutropenia benigna crónica/Agranulocitosis asociada con los antipsicóticos diferentes a la clozapina

**Reseñas Bibliográficas**

**1215** Genetic Research on Addiction: Ethics, the Law, and Public Health [Investigación genética en adicción: Ética, ley y salud pública]

**Audio**

artículo en AJP Audio: archivo .mp3 descargable de [ajp.psychiatryonline.org](http://ajp.psychiatryonline.org)

**Guías clínicas**

este artículo ofrece guías clínicas (ver página “En este Número” o al final del artículo)

**EMC**

existe un curso en línea que cubre los contenidos de este artículo para los suscriptores del programa de cursos de EMC del AJP

**Editorial**

este artículo se discute en uno de los editoriales de este número

La Tabla de Contenidos de Este Número Está Disponible en Español

(This issue’s Table of Contents is available in Spanish)

Presented in collaboration with the Office of Global Health, UMDNJ-Robert Wood Johnson Medical School

Translation courtesy of

Sergi Casals, M.A.

Garuna, Medellín, Colombia ([www.garunaeditors.com](http://www.garunaeditors.com))

Carlos Lopez Jaramillo, M.D.

Universidad de Antioquia, Medellín, Colombia

Javier I. Escobar, M.D., M.Sc.

UMDNJ-Robert Wood Johnson Medical School

Consulte *The American Journal of Psychiatry* en línea en [ajp.psychiatryonline.org](http://ajp.psychiatryonline.org)
